# Supplementary material for: Microbiological Changes during Ripening of Chihuahua Cheese Manufactured with Raw Milk and Its Seasonal Variations
Source: Foods. 2018 Sep 17;7(9):153. doi: 10.3390/foods7090153 (PMC6163408; doi:10.3390/foods7090153)
Supplement: Supplementary file 1 [file foods-07-00153-s001.pdf]

## SUPPLEMENTARY MATERIAL

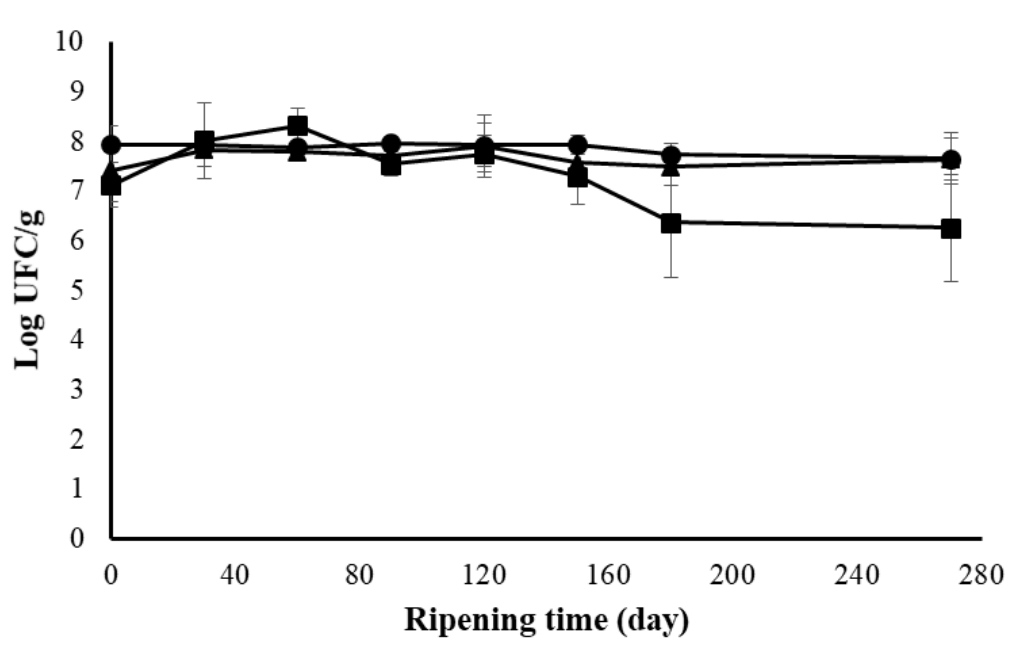

**Figure S1.** Microbial dynamic of presumptive mesophilic lactobacilli during ripening of Chihuahua cheese manufactured with raw milk during autumn (■), winter (▲) and summer (●). Data is the average and standard deviation of all five dairies included in the study.

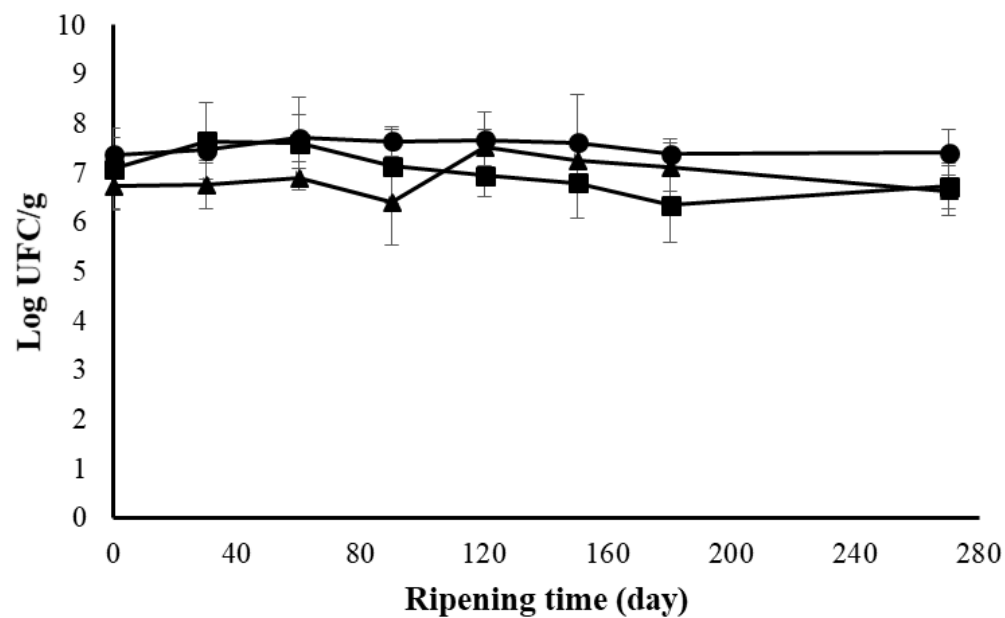

**Figure S2.** Microbial dynamic of presumptive thermophilic lactobacilli during ripening of Chihuahua cheese manufactured with raw milk during autumn (■), winter (▲) and summer (●). Data is the average and standard deviation of all five dairies included in the study.

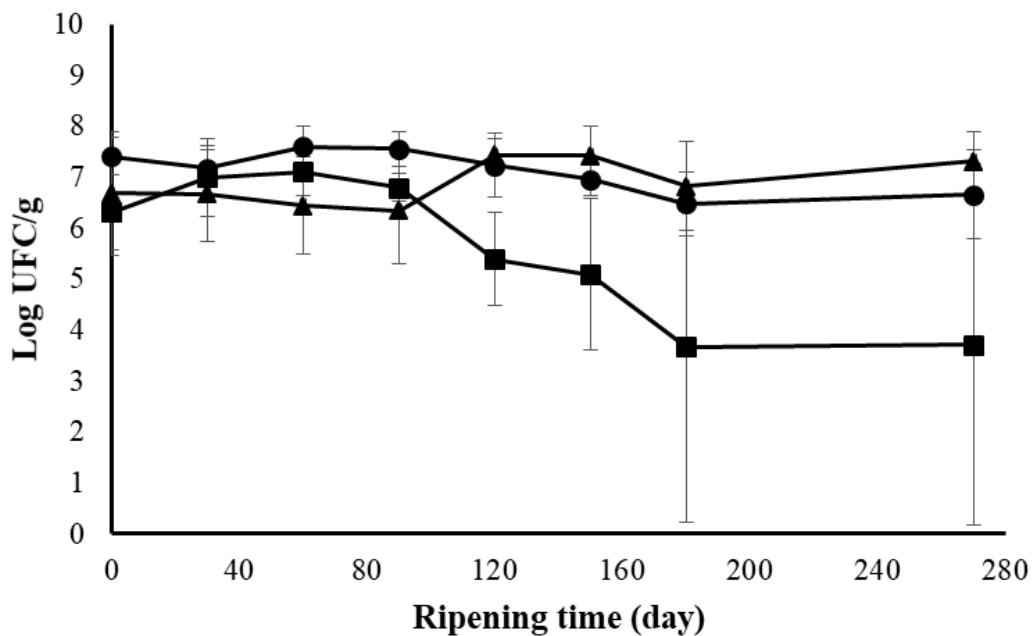

**Figure S3.** Microbial dynamic of presumptive *Lactococcus* sp. during ripening of Chihuahua cheese manufactured with raw milk during autumn (■), winter (▲) and summer (●). Data is the average and standard deviation of all five dairies included in the study.

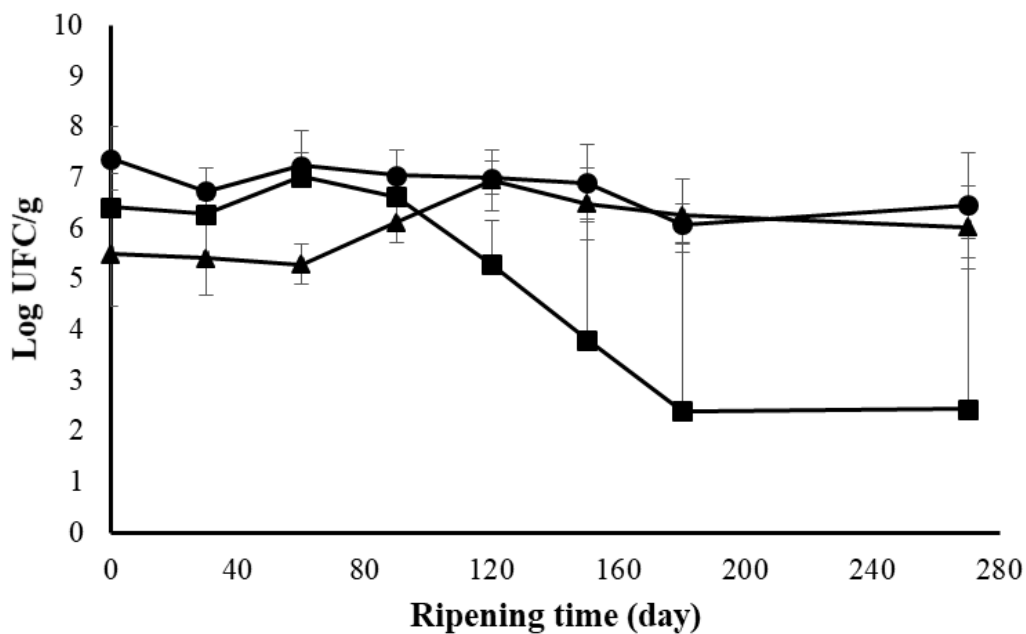

**Figure S4.** Microbial dynamic of presumptive thermophilic cocci during ripening of Chihuahua cheese manufactured with raw milk during autumn (■), winter (▲) and summer (●). Data is the average and standard deviation of all five dairies included in the study.

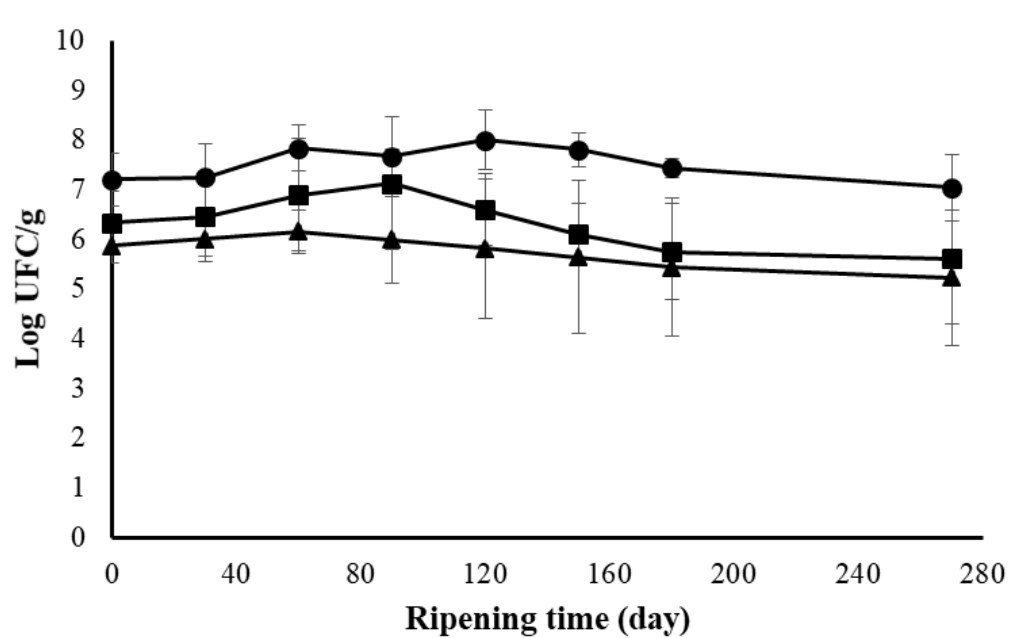

**Figure S5.** Microbial dynamic of presumptive Enterococcus during ripening of Chihuahua cheese manufactured with raw milk during autumn (■), winter (▲) and summer (●). Data is the average and standard deviation of all five dairies included in the study.
